# Supplementary material
Source: publisher figshare collection journal article supplement (https://asha.figshare.com/articles/dataset/_/16807270)
Supplement: Supplementary file 1 [file 1]

**Supplemental Material S3.** Medical history by self-report from respondents to the survey, Experiencing the SARS COVID-19 Outbreak as a Person with a Laryngectomy.

| Treatment/Surgery             | Selection                     | <i>n</i> | %   |
|-------------------------------|-------------------------------|----------|-----|
| Radiation Therapy             | None                          | 21       | 12% |
|                               | Before Laryngectomy           | 87       | 50% |
|                               | After Laryngectomy            | 52       | 30% |
|                               | Before and After Laryngectomy | 6        | 4%  |
|                               | Other                         | 6        | 4%  |
|                               | Missing                       | 1        | 1%  |
| Chemotherapy                  | None                          | 111      | 64% |
|                               | Before Laryngectomy           | 33       | 19% |
|                               | After Laryngectomy            | 20       | 12% |
|                               | Before and After Laryngectomy | 2        | 1%  |
|                               | Other                         | 5        | 3%  |
|                               | Missing                       | 2        | 1%  |
| Neck Dissection               | Yes                           | 112      | 65% |
|                               | No                            | 55       | 32% |
|                               | Missing                       | 6        | 4%  |
| Glossectomy (partial to full) | Yes                           | 11       | 6%  |
|                               | No                            | 156      | 90% |
|                               | Missing                       | 6        | 4%  |
| Pharyngectomy                 | Yes                           | 36       | 21% |
|                               | No                            | 131      | 76% |
|                               | Missing                       | 6        | 4%  |
| Esophagectomy                 | Yes                           | 12       | 7%  |
|                               | No                            | 155      | 90% |
|                               | Missing                       | 6        | 4%  |
| Flap or Graft                 | Yes                           | 61       | 35% |
|                               | No                            | 106      | 61% |
|                               | Missing                       | 6        | 4%  |
| Unsure of Surgery Details     | Yes                           | 42       | 24% |
|                               | No                            | 125      | 72% |
|                               | Missing                       | 6        | 4%  |
