# Supplementary material
Source: publisher figshare collection journal article supplement (https://asha.figshare.com/articles/dataset/_/16807270)
Supplement: Supplementary file 3 [file 1]

**Supplemental Material S2.** Distribution of respondents across states ( $N = 173$ ). Respondents to the survey, Experiencing the SARS COVID-19 Outbreak as a Person with a Laryngectomy.

| State         | <i>n</i> | %    | State          | <i>n</i> | %    |
|---------------|----------|------|----------------|----------|------|
| Alaska        | 1        | < 1% | New Hampshire  | 1        | < 1% |
| Arizona       | 7        | 4%   | New Jersey     | 6        | 4%   |
| California    | 23       | 13%  | New York       | 6        | 4%   |
| Colorado      | 2        | 1%   | North Carolina | 1        | < 1% |
| Connecticut   | 1        | < 1% | North Dakota   | 1        | < 1% |
| Delaware      | 1        | < 1% | Ohio           | 10       | 6%   |
| Florida       | 10       | 6%   | Oklahoma       | 3        | 2%   |
| Georgia       | 4        | 2%   | Oregon         | 3        | 2%   |
| Illinois      | 5        | 3%   | Pennsylvania   | 3        | 2%   |
| Indiana       | 6        | 4%   | South Carolina | 4        | 2%   |
| Iowa          | 1        | < 1% | South Dakota   | 1        | < 1% |
| Kansas        | 1        | < 1% | Texas          | 13       | 8%   |
| Kentucky      | 2        | 1%   | Vermont        | 1        | < 1% |
| Louisiana     | 3        | 2%   | Virginia       | 5        | 3%   |
| Maryland      | 3        | 2%   | Washington     | 10       | 6%   |
| Massachusetts | 1        | < 1% | West Virginia  | 4        | 2%   |
| Michigan      | 16       | 9%   | Wisconsin      | 5        | 3%   |
| Minnesota     | 4        | 2%   | Not Specified  | 3        | 1%   |
| Missouri      | 2        | 1%   |                |          |      |
